# Supplementary material for: Eu(iii)-Functionalized HOFs based on machine learning-assisted fluorescence sensing: discrimination of quinolonesviaPCA and BPNN models
Source: Royal Society of Chemistry journal article supplement (doi:10.1039/d2tc02081e), 2022-01-01
Supplement: d2tc02081e1.pdf [file d2tc02081e1.pdf]

## **Eu(III) Functionalized HOFs Based on Machine-Learning-Assisted Fluorescence**

### **Sensing: Discrimination of Quinolones via PCA and BPNN Model**

*Kai Zhu<sup>a</sup>, Xin Xu<sup>a</sup> and Bing Yan<sup>a\*</sup>*

a School of Chemical Science and Engineering, Tongji University, Siping Road 1239, Shanghai 200092,  
China.

---

\* Corresponding author: Email address: [byan@tongji.edu.cn](mailto:byan@tongji.edu.cn) (Bing Yan)

## Electronic supplementary information

**Fig. S1.** (a) Experimental PXRD patterns of Tb@HOF-GS-10 (blue line), Sm@HOF-GS-10 (green line), Dy@HOF-GS-10 (purple line) and simulated PXRD pattern (red line). (b) FT-IR spectra of HOF-GS-10 (red line), Tb@HOF-GS-10 (blue line), Sm@HOF-GS-10 (green line) and Dy@HOF-GS-10 (purple line).

**Fig. S2.** (a) XPS spectra of Eu 3d electron in  $\text{Eu}(\text{NO}_3)_6 \cdot 6\text{H}_2\text{O}$ . (b) XPS spectra of Eu 3d electron in **1**. (c) XPS spectra of O1s in HOF-GS-10. (d) XPS spectra of O1s in **1**.

**Fig. S3.** (a) SEM picture of HOF-GS-10. (b) SEM picture of **1**.

**Fig. S4.** EDX mapping images of O, N and S elements respectively in HOF-GS-10.

**Fig. S5.** (a) The element content of C (48.40%), N (17.96%), O (17.51%) and S (16.14%) elements in EDX energy spectrum of HOF-GS-10. (b) The element content of C (33.14%), N (2.42%), O (21.51%), S (12.40%) and Eu (30.52%) elements in EDX energy spectrum of **1**.

**Fig. S6.** (a) Excitation spectrum and Emission spectra of 1,5-naphthalenedisulfonic acid. (b) Excitation spectrum and Emission spectra of HOF-GS-10.

**Fig. S7.** (a) Excitation spectrum and Emission spectra of Tb@HOF-GS-10. (b) Excitation spectrum and Emission spectra of Sm@HOF-GS-10. (c) Excitation spectrum and Emission spectra of Dy@HOF-GS-10. (d) CIE chromaticity diagram obtained under excitation at 323 nm of **1** mixed with eight quinolones (QNs). The inset shows that **1** mixed with eight QNs is excited under 310 nm laboratory UV light. (The relative values of the CIE chromaticity diagram of **1** mixed with eight QNs are shown in Table S2.)

**Fig. S8.** (a) Dependence of emission intensity for **1** on temperature (10–50 °C) upon  $\lambda_{\text{ex}} = 323$  nm. (b) Histogram of emission intensity for **1** on temperature (10–50 °C) upon  $\lambda_{\text{ex}} = 323$  nm.

**Fig. S9.** Canonical 2D score plot for response patterns as obtained from PCA for ten QNs at  $10^{-3}$  M. Ellipses represent 95% confidence.

**Fig. S10.** Luminescence intensity of 616 nm peak for **1** after four repetitions with  $10^{-3}$  M eight QN solutions. (a) ciprofloxacin (CF), (b) flumequine (FQ), (c) gatifloxacin (GF), (d) levofloxacin (LF), (e) marbofloxacin (MF), (f) norfloxacin (NF), (g) ofloxacin (OF) and (h) pefloxacin (PF).

**Fig. S11.** Time-response emission spectra at 616 nm (excited at 323 nm) of **1** upon addition of  $10^{-3}$  M eight QNs. (a) ciprofloxacin (CF): RT = 52 s, (b) flumequine (FQ): RT = 32 s, (c) gatifloxacin (GF): RT = 61 s, (d) levofloxacin (LF): RT = 79 s, (e) marbofloxacin (MF): RT = 26 s, (f) norfloxacin (NF): RT = 39 s, (g) ofloxacin (OF): RT = 47 s and (h) pefloxacin (PF): RT = 67 s. (RT: response time)

**Fig. S12.** The chemical structural formula of eight QNs.

**Fig. S13.** Schematic diagram for the fluorescence response of **1** toward QNs mechanism. (ISC: intersystem crossing; ET: energy transfer)

**Fig. S14.** Decay lifetimes of emission peak of 616 nm ( $\text{Eu}^{3+} \text{}^5\text{D}_0 \rightarrow \text{}^7\text{F}_2$  transition) for **1** with  $10^{-3}$  M eight QNs. (a) ciprofloxacin (CF), (b) flumequine (FQ), (c) gatifloxacin (GF), (d) levofloxacin (LF), (e) marbofloxacin (MF), (f) norfloxacin (NF), (g) ofloxacin (OF) and (h) pefloxacin (PF).

**Fig. S15.** Canonical 2D score plot for response patterns as obtained from PCA for  $10^{-3}$  M LF、GF and 1:1 mixture of LF and GF. Ellipses represent 95% confidence.

**Fig. S16.** Canonical 2D score plot for response patterns as obtained from PCA for eight QNs at  $10^{-3}$  M in various components in (a) urine and (b) serum system ( $\lambda_{\text{ex}} = 323$  nm). Ellipses represent 95% confidence.

**Fig. S17.** Network training curve of the BPNN. Horizontal axis: Epoch; Vertical axis: Training MSE

**Fig. S18.** Deviation curve of the BPNN (OV: original value; CV: calculated value). Horizontal axis: Eight concentrations of input items; Vertical axis: Training MSE.

**Table S1.** Element contents of C, N, O, S in EDX energy spectrum HOF-GS-10 and C, N, O, S, Eu in EDX energy spectrum **1**.

**Table S2.** The relative values of the CIE chromaticity diagram of **1** mixed with eight QNs.

**Table S3.** Summary of fluorescence sensing parameters of **1** for detecting eight QNs in ethanol System.

**Table S4.** Summary of the methods for sensing FQ.

**Table S5.** Summary of fluorescence decay lifetime of **1** in ethanol (ET), **1** powder and **1** mixed with eight QNs at 298 K.

**Table S6.** Summary of input and output information during the training of BPNN for GF concentrations detection.

**Table S7.** Network structure information.

**Table S8** The summary of mean square error (MSE), original value (OV.), calculated value (CV.), variance (Var.).

**Table S9.** The summary of input and output information in real batch calculation during the test of BPNN.

## Experimental Section

### Materials and physical measurements

The PCA model was constructed by Origin 2021 program. The BPNN model was constructed in Maishi Neural Network program package. Ln@(NO<sub>3</sub>)<sub>3</sub>·6H<sub>2</sub>O (Ln=Eu, Tb, Sm, Dy) was prepared by dissolving their oxides in excess hydrogen nitrate with continuous stirring, followed by evaporation and crystallization several times. All the other reagents and solvents employed were commercially available and used as received without further purification. Ultrapure water was used throughout all experiments. The power X-ray diffraction (PXRD) pattern was recorded via a Bruker D8 Advance diffractometer, with a scan range of 2 theta from 5 to 50°. Fourier transform infrared spectra (FT-IR) of powder samples were collected on a Nicolet IS10 infrared spectrum radiometer in the range of 4000 - 400 cm<sup>-1</sup> using KBr slices. Scanning electron microscopy (SEM) and energy dispersive X-ray (EDX) analysis were performed on a Hitachi S-4800 field emission scanning electron microscope operating at 3 KV and 15 KV, respectively. X-ray photoelectron spectroscopy (XPS) spectra were recorded under ultrahigh vacuum (<10<sup>-6</sup> Pa) at a pass energy of 93.90 eV with an Axis Ultra DLD spectrometer (Kratos, Japan) by using an Mg Kα (1253.6 eV) anode. The excitation and emission spectra of the experimental samples were obtained on an Edinburgh FLS920 spectrophotometer with a xenon lamp (450 W) as an excitation source. Luminescence lifetime measurements were measured at room temperature on an Edinburgh FLS920 phosphorimeter using a microsecond lamp (100 mW). The corresponding Commission International de l'Eclairage (CIE) color coordinates were calculated on the basis of the international CIE standards.

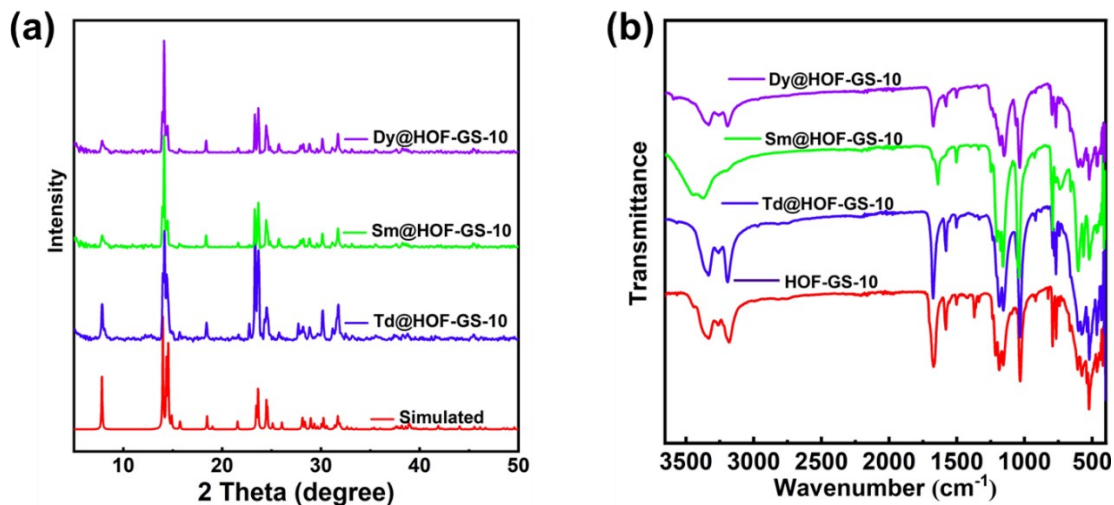

**Fig. S1.** (a) Experimental PXRD patterns of Tb@HOF-GS-10 (blue line), Sm@HOF-GS-10 (green line), Dy@HOF-GS-10 (purple line) and simulated PXRD pattern (red line). (b) FT-IR spectra of HOF-GS-10 (red line), Tb@HOF-GS-10 (blue line), Sm@HOF-GS-10 (green line), Dy@HOF-GS-10 (purple line).

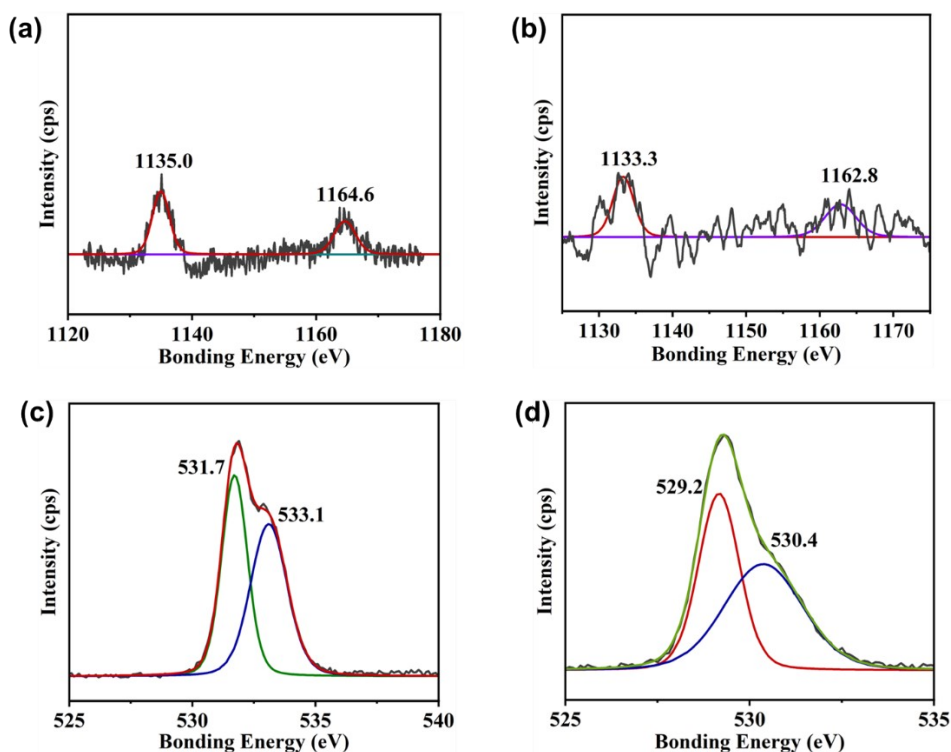

**Fig. S2.** (a) XPS spectra of Eu 3d electron in  $\text{Eu}(\text{NO}_3)\cdot 6\text{H}_2\text{O}$ . (b) XPS spectra of Eu 3d electron in **1**. (c) XPS spectra of O1s in HOF-GS-10. (d) XPS spectra of O1s in **1**.

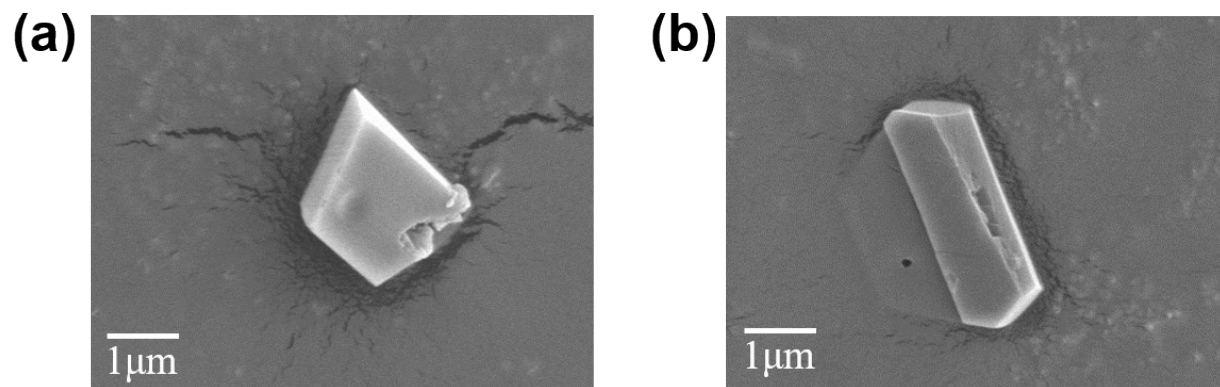

**Fig. S3.** (a) SEM picture of HOF-GS-10. (b) SEM picture of 1.

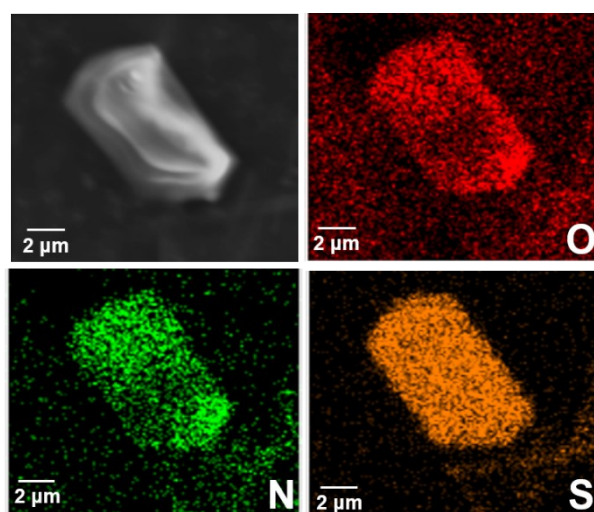

**Fig. S4.** EDX mapping images of O, N and S elements respectively in HOF-GS-10.

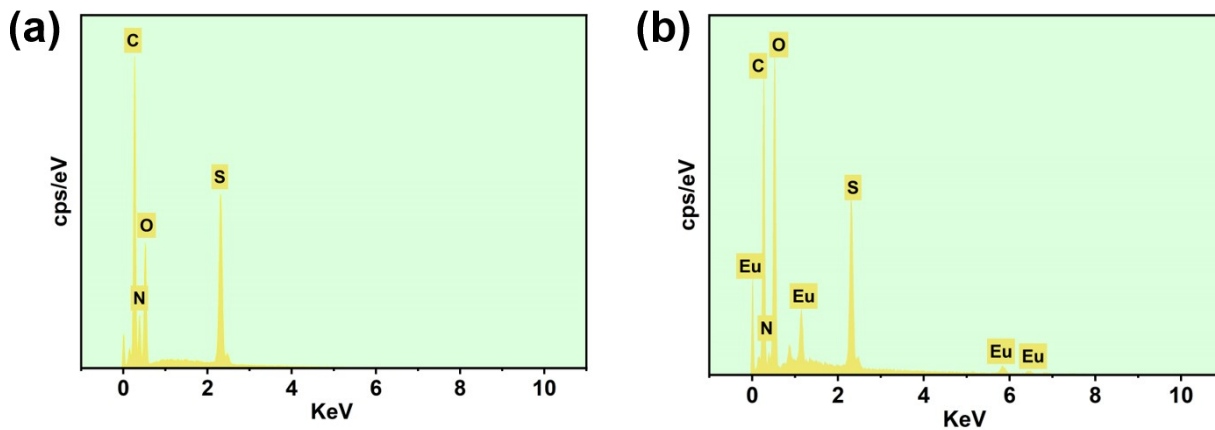

**Fig. S5.** (a) The element content of C (48.40%), N (17.96%), O (17.51%) and S (16.14%) elements in EDX energy spectrum of HOF-GS-10. (b) The element content of C (33.14%), N (2.42%), O (21.51%), S (12.40%) and Eu (30.52%) elements in EDX energy spectrum of **1**.

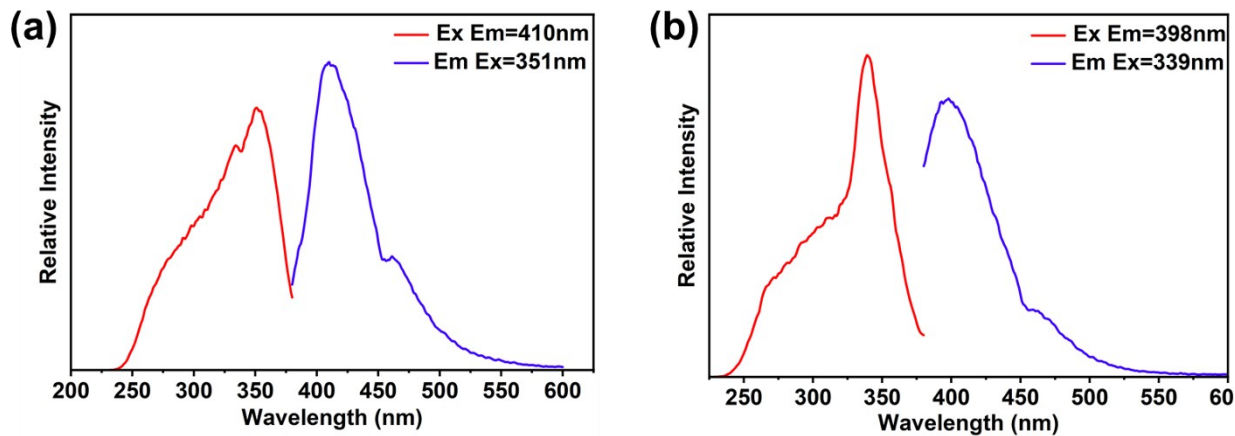

**Fig. S6.** (a) Excitation spectrum and Emission spectra of 1,5-naphthalenedisulfonic acid. (b) Excitation spectrum and Emission spectra of HOF-GS-10.



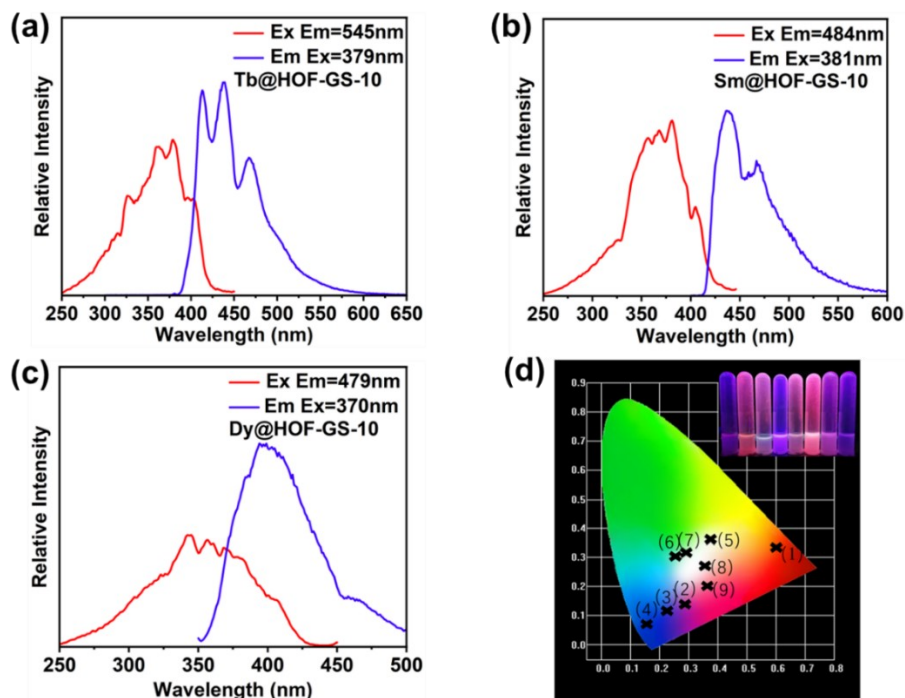

**Fig. S7.** (a) Excitation spectrum and Emission spectra of Tb@HOF-GS-10. (b) Excitation spectrum and Emission spectra of Sm@HOF-GS-10. (c) Excitation spectrum and Emission spectra of Dy@HOF-GS-10. (d) CIE chromaticity diagram obtained under excitation at 323 nm of **1** mixed with eight quinolones (QNs). The inset shows that **1** mixed with eight QNs is excited under 310 nm laboratory UV light. (The relative values of the CIE chromaticity diagram of **1** mixed with eight QNs are shown in Table S2.)

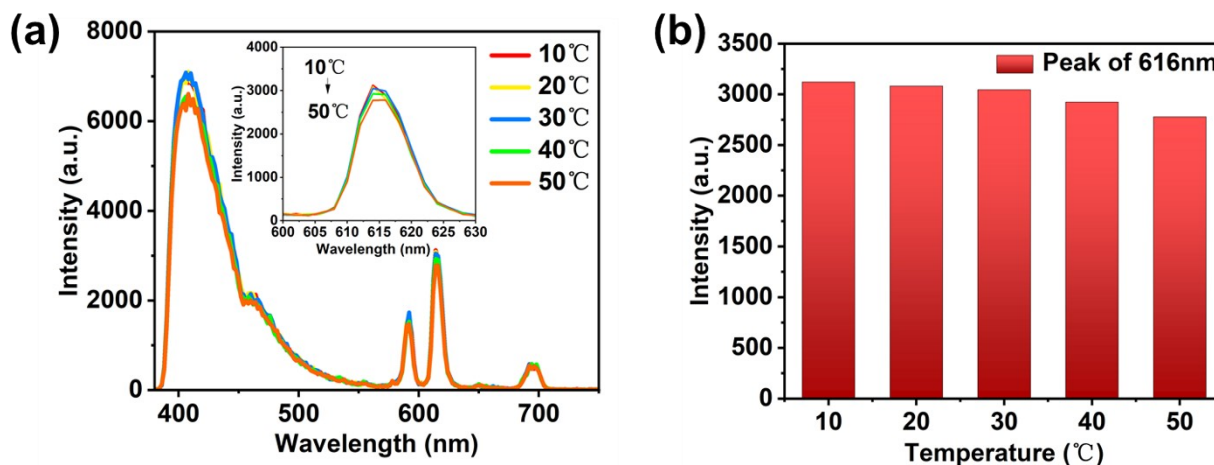

**Fig. S8.** (a) Dependence of emission intensity for **1** on temperature (10–50 °C) upon  $\lambda_{\text{ex}} = 323$  nm. (b) Histogram of emission intensity for **1** on temperature (10–50 °C) upon  $\lambda_{\text{ex}} = 323$  nm.

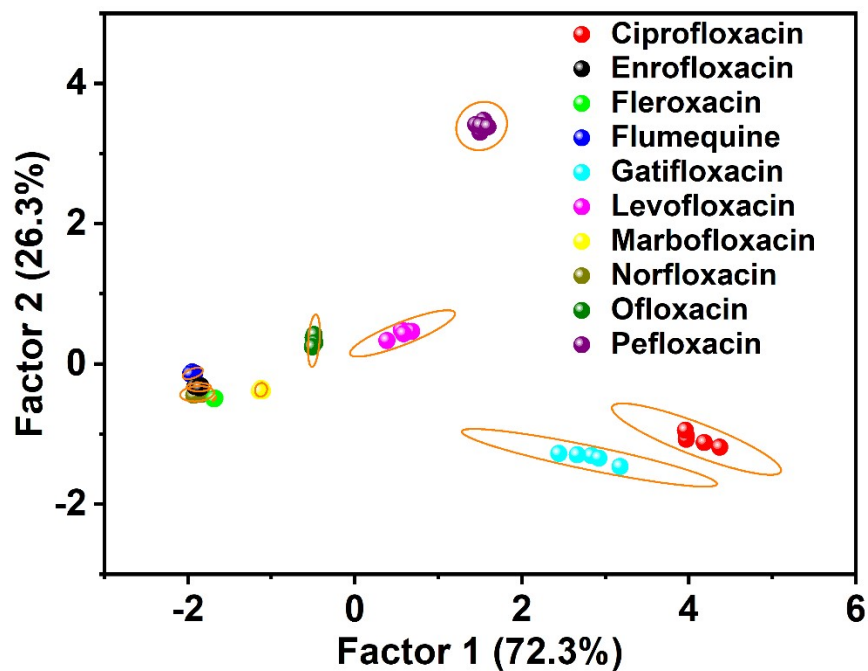

**Fig. S9.** Canonical 2D score plot for response patterns as obtained from PCA for ten QNs at  $10^{-3}$  M. Ellipses represent 95% confidence.

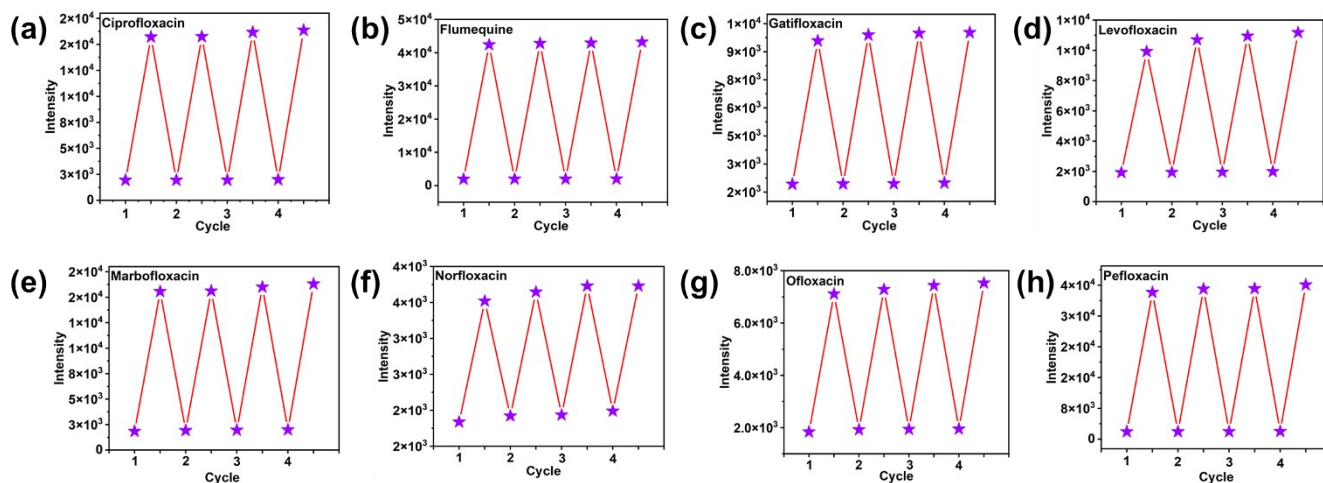

**Fig. S10.** Luminescence intensity of 616 nm peak for 1 after four repetitions with  $10^{-3}$  M eight QN solutions. (a) ciprofloxacin (CF), (b) flumequine (FQ), (c) gatifloxacin (GF), (d) levofloxacin (LF), (e) marbofloxacin (MF), (f) norfloxacin (NF), (g) ofloxacin (OF) and (h) pefloxacin (PF).

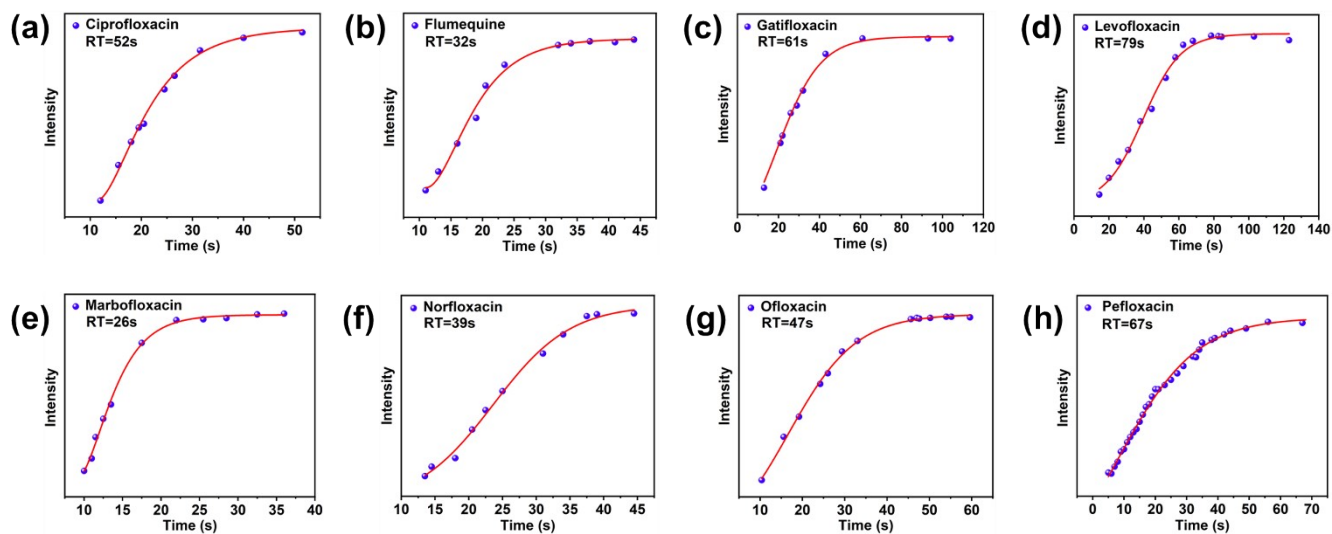

**Fig. S11.** Time-response emission spectra at 616 nm (excited at 323 nm) of **1** upon addition of  $10^{-3}$  M eight QNs. (a) ciprofloxacin (CF): RT = 52 s, (b) flumequine (FQ): RT = 32 s, (c) gatifloxacin (GF): RT = 61 s, (d) levofloxacin (LF): RT = 79 s, (e) marbofloxacin (MF): RT = 26 s, (f) norfloxacin (NF): RT = 39 s, (g) ofloxacin (OF): RT = 47 s and (h) pefloxacin (PF): RT = 67 s. (RT: response time)

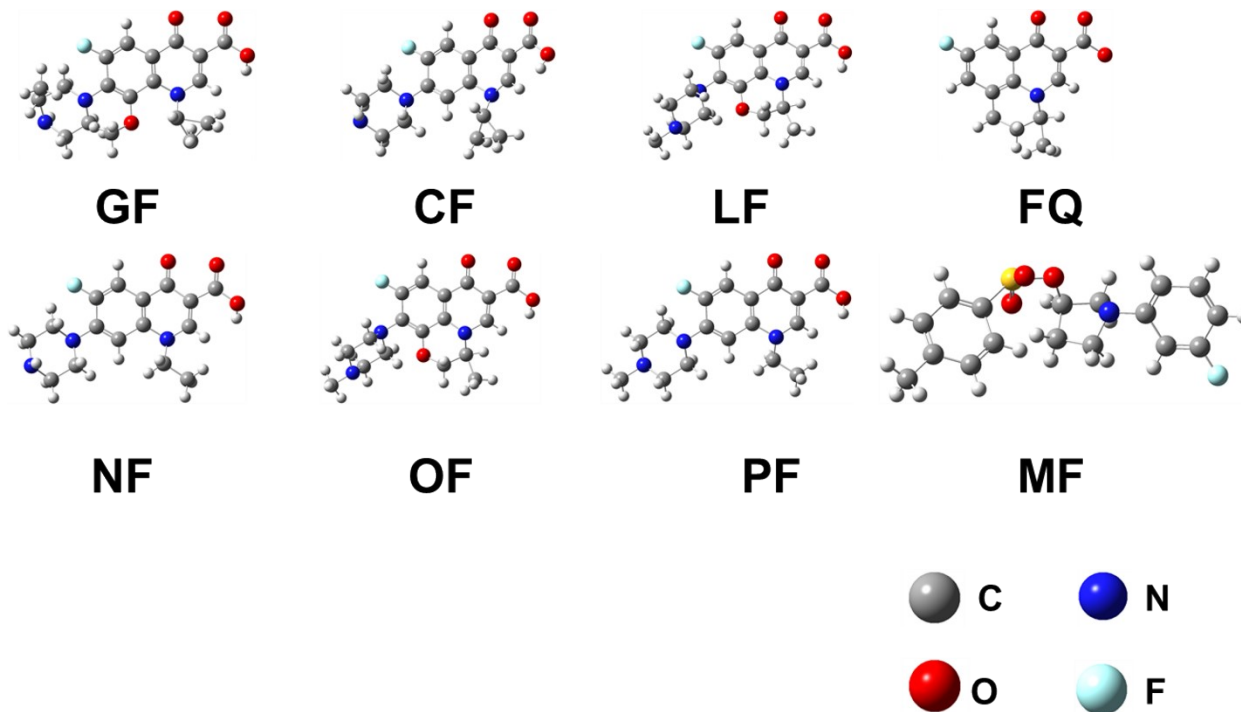

**Fig. S12.** The chemical structural formula of eight QNs.

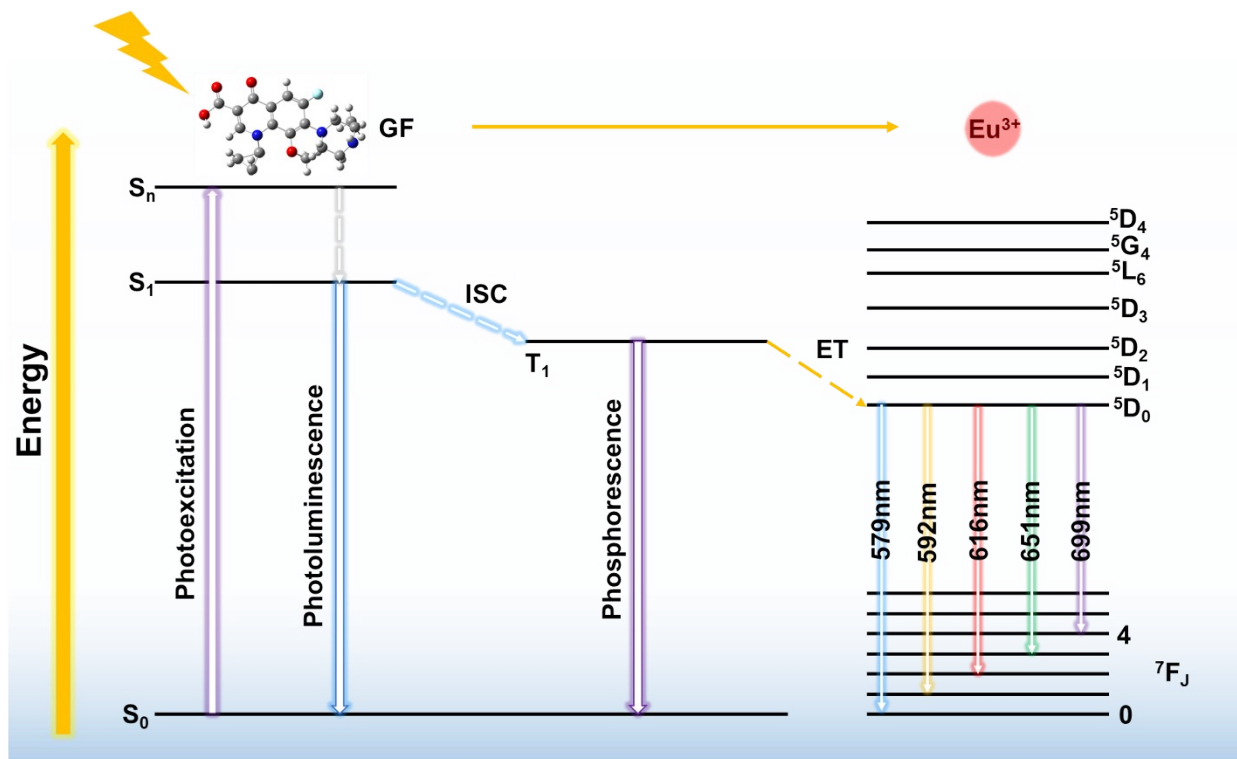

**Fig. S13.** Schematic diagram for the fluorescence response of **1** toward QNs mechanism. (ISC: intersystem crossing; ET: energy transfer)

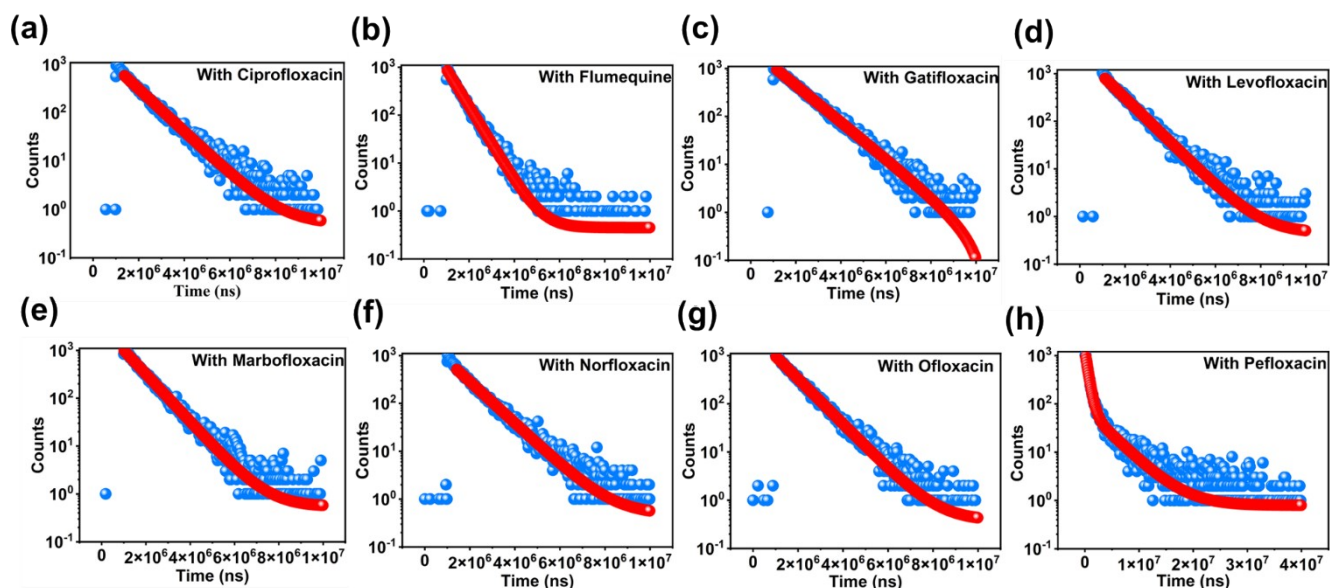

**Fig. S14.** Decay lifetimes of emission peak of 616 nm ( $\text{Eu}^{3+} \ ^5\text{D}_0 \rightarrow \ ^7\text{F}_2$  transition) for **1** with  $10^{-3}$  M eight QNs. (a) ciprofloxacin (CF), (b) flumequine (FQ), (c) gatifloxacin (GF), (d) levofloxacin (LF), (e) marbofloxacin (MF), (f) norfloxacin (NF), (g) ofloxacin (OF) and (h) pefloxacin (PF).

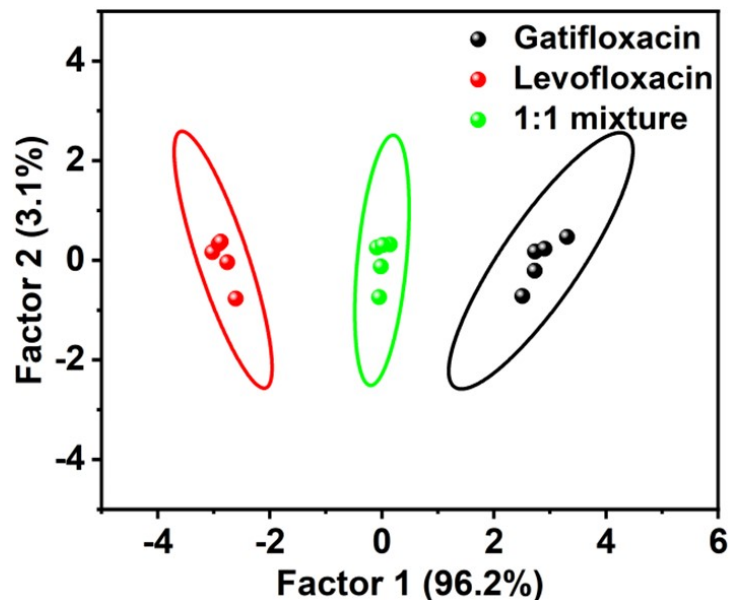

**Fig. S15.** Canonical 2D score plot for response patterns as obtained from PCA for  $10^{-3}$  M LF, GF and 1:1 mixture of LF and GF. Ellipses represent 95% confidence.

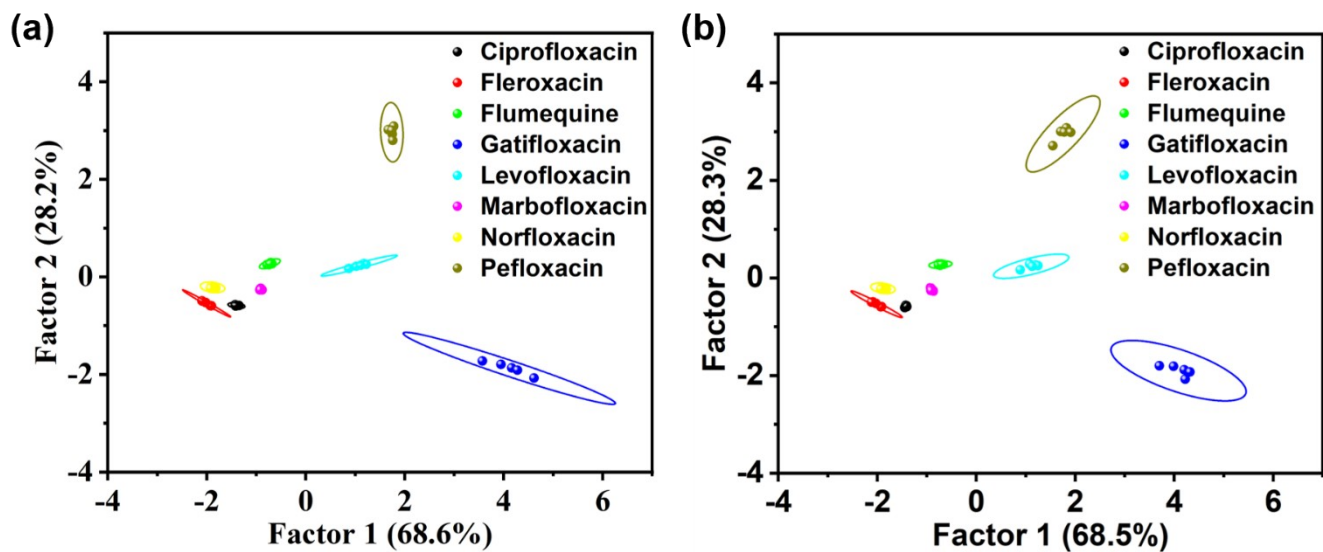

**Fig. S16.** Canonical 2D score plot for response patterns as obtained from PCA for eight QNs at  $10^{-3}$  M in various components in (a) urine and (b) serum system ( $\lambda_{\text{ex}} = 323$  nm). Ellipses represent 95% confidence.

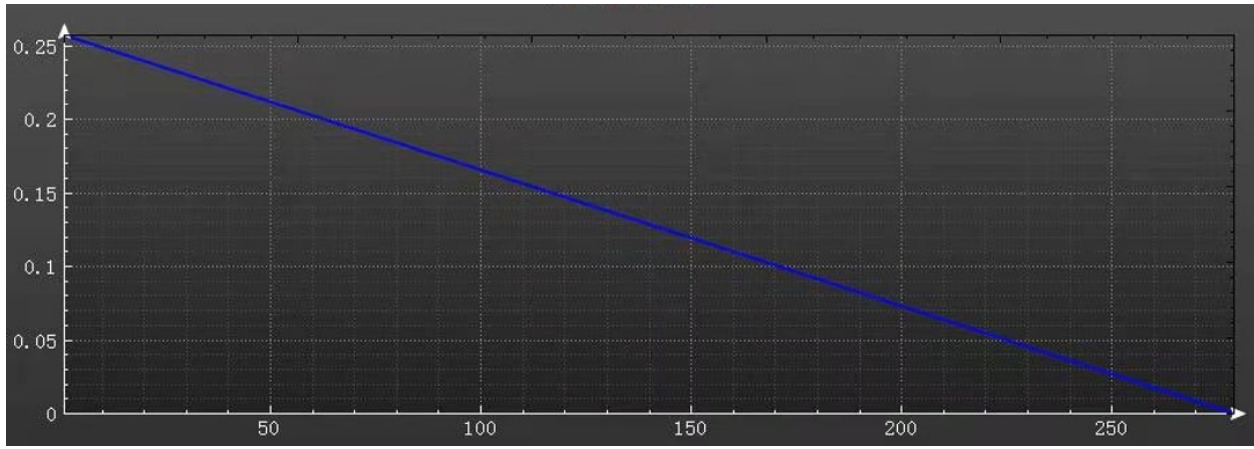

**Fig. S17.** Network training curve of the BPNN. Horizontal axis: Epoch; Vertical axis: Training MSE

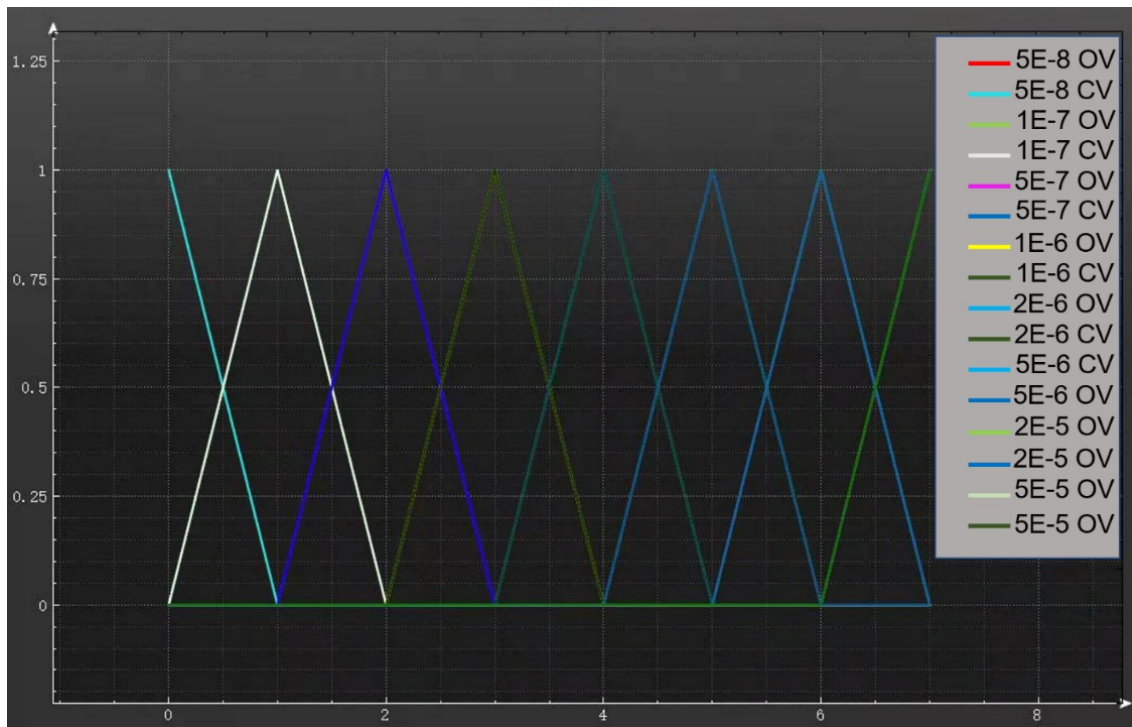

**Fig. S18.** Deviation curve of the BPNN (OV: original value; CV: calculated value). Horizontal axis: Eight concentrations of input items; Vertical axis: Training MSE.

**Table S1.** Element contents of C, N, O, S in EDX energy spectrum HOF-GS-10 and C, N, O, S, Eu in EDX energy spectrum **1**.

| Element | Weight percentages (%) |              | Atomic percentage (%) |              |
|---------|------------------------|--------------|-----------------------|--------------|
|         | HOF-GS-10              | Eu@HOF-GS-10 | HOF-GS-10             | Eu@HOF-GS-10 |
| C       | 48.40                  | 33.14        | 57.04                 | 56.79        |
| N       | 17.96                  | 2.42         | 18.15                 | 3.50         |
| O       | 17.51                  | 21.51        | 15.48                 | 27.57        |
| S       | 16.14                  | 12.40        | 7.13                  | 8.02         |
| Eu      | -                      | 30.52        | -                     | 4.12         |
| Total   | 100                    | 100          | 100                   | 100          |

**Table S2.** The relative values of the CIE chromaticity diagram of **1** mixed with eight QNs.

| CIE chromaticity diagram |               |                  |
|--------------------------|---------------|------------------|
| Serial number            | Compounds     | CIE              |
| (1)                      | Blank         | (0.5992, 0.3356) |
| (2)                      | Flumequine    | (0.2852, 0.1341) |
| (3)                      | Norfloxacin   | (0.2232, 0.1175) |
| (4)                      | Pefloxacin    | (0.1589, 0.0729) |
| (5)                      | Marbofloxacin | (0.3747, 0.3546) |
| (6)                      | Ofloxacin     | (0.2588, 0.3058) |
| (7)                      | Levofloxacin  | (0.2908, 0.3178) |
| (8)                      | Gatifloxacin  | (0.3498, 0.2694) |
| (9)                      | Ciprofloxacin | (0.3617, 0.1985) |

**Table S3.** Summary of fluorescence sensing parameters of **1** for detecting eight QNs in ethanol System.

| Drug | Concentration range                     | Linear relationship            | $K_{EC}$ (mM) | $R^2$  | Detection limit (mg L <sup>-1</sup> ) |
|------|-----------------------------------------|--------------------------------|---------------|--------|---------------------------------------|
| NF   | 10 <sup>-7</sup> - 10 <sup>-5</sup>     | $y = 6 \times 10^9 x - 170.29$ | 711.56        | 0.995  | 0.00782                               |
| OF   | 10 <sup>-7</sup> - 10 <sup>-5</sup>     | $y = 2 \times 10^9 x + 3804.9$ | 273.87        | 0.998  | 0.0265                                |
| CF   | 5×10 <sup>-8</sup> - 10 <sup>-5</sup>   | $y = 7 \times 10^9 x + 486.69$ | 965.93        | 0.9949 | 0.00695                               |
| LF   | 5×10 <sup>-8</sup> - 10 <sup>-5</sup>   | $y = 2 \times 10^9 x + 1166.5$ | 238.67        | 0.9992 | 0.0265                                |
| MF   | 5×10 <sup>-8</sup> - 10 <sup>-5</sup>   | $y = 4 \times 10^9 x + 2272.3$ | 421.91        | 0.9987 | 0.0133                                |
| PF   | 5×10 <sup>-8</sup> - 10 <sup>-5</sup>   | $y = 4 \times 10^9 x + 2402.3$ | 526.68        | 0.9921 | 0.0122                                |
| GF   | 5×10 <sup>-8</sup> - 5×10 <sup>-5</sup> | $y = 3 \times 10^9 x + 5154.8$ | 352.01        | 0.9978 | 0.0184                                |
| FQ   | 5×10 <sup>-8</sup> - 5×10 <sup>-6</sup> | $y = 2 \times 10^9 x + 709.32$ | 117.72        | 0.9915 | 0.0192                                |

**Table S4.** Summary of the methods for sensing FQ.

| method                                                            | LOD (mg L <sup>-1</sup> ) | $K_{EC}$ (mM <sup>-1</sup> ) | Ref  |
|-------------------------------------------------------------------|---------------------------|------------------------------|------|
| Fluorescence detection (Ln@MOF)                                   | 0.0723                    | 167.98                       | [S1] |
| Fluorescence detection (Ln@HOF)                                   | 0.114                     | -                            | [S2] |
| Plate diffusion (Yersinia spp. Strain)                            | 0.1                       | -                            | [S3] |
| Biomimetic enzyme-linked immunosorbent assay                      | 0.141                     | -                            | [S4] |
| Chiral liquid chromatography-tandem mass spectrometry             | 0.015                     | -                            | [S5] |
| Chiral liquid chromatography                                      | 0.016                     | -                            | [S6] |
| Liquid chromatography-electron spray ionization mass spectrometry | 0.151                     | -                            | [S7] |

## Reference

- [S1] S. Li, Y. Li, B. Yan, *CrystEngComm*, 2021, **23**, 5345-5352.
- [S2] X. Xu, J. Wang, B. Yan, *Adv. Funct. Mater.*, 2021, **31**, 2103321.
- [S3] P. Navrátilová, J. Vyhnálková, L. Vorlová, *J. Vet. Res.*, 2017, **61**, 467-472.
- [S4] W. Liu, J. Wang, W. Yu, X. Wang, *Food Anal. Methods*, 2020, **13**, 403-411.
- [S5] S. Li, B. Liu, M. Xue, J. Yu, X. Guo, *Chirality*, 2019, **31**, 968-978.
- [S6] Y.-F. Wang, X.-F. Gao, H.-X. Jin, Y.-G. Wang, W.-J. Wu, X.-K. Ouyang, *Chirality*, 2016, **28**, 649-655.
- [S7] Z. H. Hu, Y. G. Wang, H. X. Jin, X. K. Ouyang, W. J. Wu, *Chirality*, 2016, **28**, 737-743.



**Table S5.** Summary of fluorescence decay lifetime of **1** in ethanol (ET), **1** powder and **1** mixed with eight QNs at 298 K.

| Sample   | $\lambda_{\text{ex}}$<br>(nm) | $\lambda_{\text{em}}$<br>(nm) | $\tau_1$<br>( $\mu\text{s}$ ) | $A_1$   | Percentage<br>(%) | $\tau_2$<br>( $\mu\text{s}$ ) | $A_2$ | Percentage<br>(%) | $\tau^*$<br>( $\mu\text{s}$ ) | $\chi^2$ |
|----------|-------------------------------|-------------------------------|-------------------------------|---------|-------------------|-------------------------------|-------|-------------------|-------------------------------|----------|
| 1 in ET  | 323                           | 616                           | 371.48                        | 330.92  | 100               |                               |       |                   |                               | 1.001    |
| 1 Powder | 323                           | 616                           | 385.04                        | 1100.18 | 100               |                               |       |                   |                               | 1        |
| 1-FQ     | 323                           | 616                           | 558.89                        | 878.35  | 100               |                               |       |                   |                               | 0.997    |
| 1-MF     | 323                           | 616                           | 871.8                         | 1002.75 | 100               |                               |       |                   |                               | 1.38     |
| 1-OF     | 323                           | 616                           | 927.22                        | 963.35  | 100               |                               |       | —                 |                               | 1.122    |
| 1-LF     | 323                           | 616                           | 935.68                        | 807.11  | 100               |                               |       |                   |                               | 1.379    |
| 1-CF     | 323                           | 616                           | 983.19                        | 598.42  | 100               |                               |       |                   |                               | 1.469    |
| 1-NF     | 323                           | 616                           | 997.86                        | 518.75  | 100               |                               |       |                   |                               | 1.266    |
| 1-GF     | 323                           | 616                           | 1129.65                       | 953.87  | 100               |                               |       |                   |                               | 1.256    |
| 1-PF     | 323                           | 616                           | 563.81                        | 1002.4  | 64.91             | 3987.98                       | 76.63 | 35.09             | 1765.54                       | 1.196    |

$$[\tau^* = (A_1\tau_1^2 + A_2\tau_2^2)/(A_1\tau_1 + A_2\tau_2)]$$

**Table S6.** Summary of input and output information during the training of BPNN for GF concentrations detection.

| Input<br>I/I <sub>0</sub> | Output               |                      |                      |                      |                      |                      |                      |                      |
|---------------------------|----------------------|----------------------|----------------------|----------------------|----------------------|----------------------|----------------------|----------------------|
|                           | 5×10 <sup>-8</sup> M | 1×10 <sup>-7</sup> M | 5×10 <sup>-7</sup> M | 1×10 <sup>-6</sup> M | 2×10 <sup>-6</sup> M | 5×10 <sup>-6</sup> M | 2×10 <sup>-5</sup> M | 5×10 <sup>-5</sup> M |
| 1.12425                   | 1                    | 0                    | 0                    | 0                    | 0                    | 0                    | 0                    | 0                    |
| 1.62626                   | 0                    | 1                    | 0                    | 0                    | 0                    | 0                    | 0                    | 0                    |
| 3.33199                   | 0                    | 0                    | 1                    | 0                    | 0                    | 0                    | 0                    | 0                    |
| 4.10211                   | 0                    | 0                    | 0                    | 1                    | 0                    | 0                    | 0                    | 0                    |
| 5.64889                   | 0                    | 0                    | 0                    | 0                    | 1                    | 0                    | 0                    | 0                    |
| 11.4487                   | 0                    | 0                    | 0                    | 0                    | 0                    | 1                    | 0                    | 0                    |
| 29.5322                   | 0                    | 0                    | 0                    | 0                    | 0                    | 0                    | 1                    | 0                    |
| 69.2656                   | 0                    | 0                    | 0                    | 0                    | 0                    | 0                    | 0                    | 1                    |

In [Table S6](#), all data is applied for training the BPNN. The I/I<sub>0</sub> values at 616 nm of every GF concentration as input information are inputted in the input column of the BPNN. Various “0” and “1” inputted into the output column of the BPNN, in which “0” represents the false GF concentration, and “1” represents the correct GF concentration. All data is used to train the BPNN.

**Table S7. Network structure information.**

| Network structure information    |                        |                  |                 |                  |
|----------------------------------|------------------------|------------------|-----------------|------------------|
| Input layer                      | 1 neurons              | 1 Paranoid       |                 |                  |
| Hidden layer 1                   | 6 neurons              | 1 Paranoid       |                 |                  |
| Hidden layer 2                   | 6 neurons              | 1 Paranoid       |                 |                  |
| Hidden layer 3                   | 6 neurons              | 1 Paranoid       |                 |                  |
| Output layer                     | 8 neurons              |                  |                 |                  |
| Network type                     | FANN_NETTYPE_LAYER     |                  |                 |                  |
| Training function                | FANN_TRAIN_RPROP       |                  |                 |                  |
| Error function                   | FANN_ERRORFUNC_LINEAR  |                  |                 |                  |
| Termination function             | FANN_STOPFUNC_MSE      |                  |                 |                  |
| Hidden layer excitation function | FANN_SIGMOID_SYMMETRIC |                  |                 |                  |
| Output layer excitation function | FANN_SIGMOID_SYMMETRIC |                  |                 |                  |
| Network weight value             |                        |                  |                 |                  |
| Arrangement                      | Wire number            | Output point (n) | Input point (m) | Weight value (W) |
| 1                                | 0                      | 0                | 2               | -0.0889867       |
|                                  | 1                      | 1                | 2               | 0.484308         |
|                                  | 2                      | 0                | 3               | 0.688136         |
|                                  | 3                      | 1                | 3               | -0.166992        |
|                                  | 4                      | 0                | 4               | 0.705895         |
|                                  | 5                      | 1                | 4               | 0.575009         |
|                                  | 6                      | 0                | 5               | 2.01062          |
|                                  | 7                      | 1                | 5               | 0.366775         |
|                                  | 8                      | 0                | 6               | 0.728024         |
|                                  | 9                      | 1                | 6               | 0.691508         |
|                                  | 10                     | 0                | 7               | 0.690002         |
|                                  | 11                     | 1                | 7               | 0.678255         |
|                                  | 12                     | 2                | 9               | -0.395007        |
|                                  | 13                     | 3                | 9               | 0.559811         |
|                                  | 14                     | 4                | 9               | 1.19369          |
|                                  | 15                     | 5                | 9               | 0.010263         |
|                                  | 16                     | 6                | 9               | 1.13474          |
|                                  | 17                     | 7                | 9               | 0.569057         |
|                                  | 18                     | 8                | 9               | -0.226494        |
|                                  | 19                     | 2                | 10              | -0.21492         |
| 2                                | 20                     | 3                | 10              | 0.677634         |
|                                  | 21                     | 4                | 10              | 1.92465          |
|                                  | 22                     | 5                | 10              | 0.0486169        |
|                                  | 23                     | 6                | 10              | 1.16593          |
|                                  | 24                     | 7                | 10              | -0.815626        |
|                                  | 25                     | 8                | 10              | -0.159978        |
|                                  | 26                     | 2                | 11              | 0.396039         |
|                                  | 27                     | 3                | 11              | 0.75535          |
|                                  | 28                     | 4                | 11              | 3.97776          |
|                                  | 29                     | 5                | 11              | 1.14153          |
|                                  | 30                     | 6                | 11              | 26.5029          |
|                                  | 31                     | 7                | 11              | 608.978          |
|                                  | 32                     | 8                | 11              | 1.71353          |

3

|    |    |    |            |
|----|----|----|------------|
| 33 | 2  | 12 | 0.0955819  |
| 34 | 3  | 12 | 1.2952     |
| 35 | 4  | 12 | 67.2629    |
| 36 | 5  | 12 | 1.17687    |
| 37 | 6  | 12 | 230.436    |
| 38 | 7  | 12 | 30.8023    |
| 39 | 8  | 12 | 2.32355    |
| 40 | 2  | 13 | -0.0917954 |
| 41 | 3  | 13 | 0.623873   |
| 42 | 4  | 13 | 25.2375    |
| 43 | 5  | 13 | 0.0198081  |
| 44 | 6  | 13 | 13.4625    |
| 45 | 7  | 13 | 4.27035    |
| 46 | 8  | 13 | -0.111031  |
| 47 | 2  | 14 | -0.103488  |
| 48 | 3  | 14 | 0.695615   |
| 49 | 4  | 14 | 1.38954    |
| 50 | 5  | 14 | -0.138719  |
| 51 | 6  | 14 | 1.59029    |
| 52 | 7  | 14 | -0.0399597 |
| 53 | 8  | 14 | -0.101403  |
| 54 | 9  | 16 | 0.939571   |
| 55 | 10 | 16 | 1.56291    |
| 56 | 11 | 16 | 0.331996   |
| 57 | 12 | 16 | 0.949294   |
| 58 | 13 | 16 | -3.36237   |
| 59 | 14 | 16 | 0.808534   |
| 60 | 15 | 16 | 2.57041    |
| 61 | 9  | 17 | 1.51703    |
| 62 | 10 | 17 | 1.58897    |
| 63 | 11 | 17 | 1.03478    |
| 64 | 12 | 17 | 2.99107    |
| 65 | 13 | 17 | 9.0174     |
| 66 | 14 | 17 | 1.30292    |
| 67 | 15 | 17 | 0.371097   |
| 68 | 9  | 18 | -0.233343  |
| 69 | 10 | 18 | -0.216328  |
| 70 | 11 | 18 | -0.973328  |
| 71 | 12 | 18 | -1.83077   |
| 72 | 13 | 18 | -0.391698  |
| 73 | 14 | 18 | -0.214747  |
| 74 | 15 | 18 | -0.0605006 |
| 75 | 9  | 19 | 122.824    |
| 76 | 10 | 19 | 108.874    |
| 77 | 11 | 19 | -0.846042  |
| 78 | 12 | 19 | 0.991912   |
| 79 | 13 | 19 | 1.1093     |
| 80 | 14 | 19 | 19.3405    |
| 81 | 15 | 19 | -1500      |

|     |    |    |           |
|-----|----|----|-----------|
| 82  | 9  | 20 | 1.33649   |
| 83  | 10 | 20 | 1.41384   |
| 84  | 11 | 20 | 2.16705   |
| 85  | 12 | 20 | -1.92816  |
| 86  | 13 | 20 | 1.27245   |
| 87  | 14 | 20 | 0.801562  |
| 88  | 15 | 20 | -0.105515 |
| 89  | 9  | 21 | 0.910961  |
| 90  | 10 | 21 | 0.435861  |
| 91  | 11 | 21 | -0.426692 |
| 92  | 12 | 21 | -0.467539 |
| 93  | 13 | 21 | -0.34581  |
| 94  | 14 | 21 | 0.460003  |
| 95  | 15 | 21 | -0.062001 |
| 96  | 16 | 23 | 75.5869   |
| 97  | 17 | 23 | 195.675   |
| 98  | 18 | 23 | 167.497   |
| 99  | 19 | 23 | 247.15    |
| 100 | 20 | 23 | 9.55186   |
| 101 | 21 | 23 | 1137.58   |
| 102 | 22 | 23 | 29.5664   |
| 103 | 16 | 24 | -2.65559  |
| 104 | 17 | 24 | -6.2509   |
| 105 | 18 | 24 | 28.7103   |
| 106 | 19 | 24 | 4.00223   |
| 107 | 20 | 24 | 43.2315   |
| 108 | 21 | 24 | 21.7192   |
| 109 | 22 | 24 | -7.6881   |
| 110 | 16 | 25 | -7.15568  |
| 111 | 17 | 25 | -18.5733  |
| 112 | 18 | 25 | -3.11314  |
| 113 | 19 | 25 | 2.65863   |
| 114 | 20 | 25 | 21.4741   |
| 115 | 21 | 25 | -16.853   |
| 116 | 22 | 25 | -12.0277  |
| 117 | 16 | 26 | -1.42526  |
| 118 | 17 | 26 | -12.8793  |
| 119 | 18 | 26 | -15.5003  |
| 120 | 19 | 26 | 1.79055   |
| 121 | 20 | 26 | -17.6899  |
| 122 | 21 | 26 | -2.09541  |
| 123 | 22 | 26 | -17.9254  |
| 124 | 16 | 27 | -4.44654  |
| 125 | 17 | 27 | 41.5712   |
| 126 | 18 | 27 | 0.306322  |
| 127 | 19 | 27 | 0.604404  |
| 128 | 20 | 27 | -54.6462  |
| 129 | 21 | 27 | 24.7767   |
| 130 | 22 | 27 | -19.304   |

|     |    |    |            |
|-----|----|----|------------|
| 131 | 16 | 28 | -40.5971   |
| 132 | 17 | 28 | 23.3047    |
| 133 | 18 | 28 | -0.0346161 |
| 134 | 19 | 28 | 0.174518   |
| 135 | 20 | 28 | -21.7797   |
| 136 | 21 | 28 | -8.89355   |
| 137 | 22 | 28 | -0.768783  |
| 138 | 16 | 29 | -56.7186   |
| 139 | 17 | 29 | 2.63563    |
| 140 | 18 | 29 | 0.143866   |
| 141 | 19 | 29 | 0.115309   |
| 142 | 20 | 29 | 44.272     |
| 143 | 21 | 29 | 0.421034   |
| 144 | 22 | 29 | -3.59557   |
| 145 | 16 | 30 | -9.44276   |
| 146 | 17 | 30 | 3.25947    |
| 147 | 18 | 30 | 7.22379    |
| 148 | 19 | 30 | 14.6223    |
| 149 | 20 | 30 | 55.5271    |
| 150 | 21 | 30 | 46.493     |
| 151 | 22 | 30 | -9.86686   |

**Input / output column coefficients for manual calculation**

| Listing    | Minimum | Maximum |
|------------|---------|---------|
| I/O        | 1.06803 | 72.9112 |
| 0.0000005M | 0       | 1       |
| 0.0000001M | 0       | 1       |
| 0.0000005M | 0       | 1       |
| 0.000001M  | 0       | 1       |
| 0.000002M  | 0       | 1       |
| 0.000005M  | 0       | 1       |
| 0.00002M   | 0       | 1       |
| 0.00005M   | 0       | 1       |

**Deviation statistics: mean variance**

| Listing    | All rows    | Calculation line | Test line |
|------------|-------------|------------------|-----------|
| 0.0000005M | 0           | 0                | 0         |
| 0.0000001M | 7.06113E-09 | 7.06113E-09      | 0         |
| 0.0000005M | 3.57022E-09 | 3.57022E-09      | 0         |
| 0.000001M  | 1.67194E-08 | 1.67194E-08      | 0         |
| 0.000002M  | 1.6875E-12  | 1.6875E-12       | 0         |
| 0.000005M  | 1.20697E-07 | 1.20697E-07      | 0         |
| 0.00002M   | 5.18104E-07 | 5.18104E-07      | 0         |
| 0.00005M   | 6.90625E-12 | 6.90625E-12      | 0         |

---

**Table S8.** The summary of mean square error (MSE), original value (OV.), calculated value (CV.),

variance (Var.).

| Input item ( $I/I_0$ )                 |      | 1.12425   | 1.62626   | 3.33199   | 4.10211   | 5.64889   | 11.4487   | 29.5322   | 69.2656   |
|----------------------------------------|------|-----------|-----------|-----------|-----------|-----------|-----------|-----------|-----------|
| $5 \times 10^{-8}$ M<br>(MSE=0)        | OV.  | 1         | 0         | 0         | 0         | 0         | 0         | 0         | 0         |
|                                        | CV.  | 1         | 0         | 0         | 0         | 0         | 0         | 0         | 0         |
|                                        | Var. | 0         | 0         | 0         | 0         | 0         | 0         | 0         | 0         |
| $1 \times 10^{-7}$ M<br>(MSE=7.06e-09) | OV.  | 0         | 1         | 0         | 0         | 0         | 0         | 0         | 0         |
|                                        | CV.  | 0.00002   | 0.999964  | 0.000163  | 0         | 0         | 0         | 0         | 0.000168  |
|                                        | Var. | 4.000E-10 | 1.296E-09 | 2.657E-08 | 0         | 0         | 0         | 0         | 2.822E-08 |
| $5 \times 10^{-7}$ M<br>(MSE=3.57e-09) | OV.  | 0         | 0         | 1         | 0         | 0         | 0         | 0         | 0         |
|                                        | CV.  | 0         | 0.000029  | 0.99992   | 0.0001305 | 0         | 0         | 0.0000655 | 0.0000005 |
|                                        | Var. | 0         | 8.410E-10 | 6.400E-09 | 1.703E-08 | 0         | 0         | 4.290E-09 | 2.500E-13 |
| $1 \times 10^{-6}$ M<br>(MSE=1.67e-08) | OV.  | 0         | 0         | 0         | 1         | 0         | 0         | 0         | 0         |
|                                        | CV.  | 0.000192  | 0         | 0.00007   | 0.999829  | 0.0002505 | 0         | 0         | 0         |
|                                        | Var. | 3.686E-08 | 0         | 4.9E-09   | 2.924E-08 | 6.28E-08  | 0         | 0         | 0         |
| $2 \times 10^{-6}$ M<br>(MSE=1.69e-12) | OV.  | 0         | 0         | 0         | 0         | 1         | 0         | 0         | 0         |
|                                        | CV.  | 0.0000005 | 0         | 0         | 0         | 0.999999  | 0.0000035 | 0         | 0         |
|                                        | Var. | 2.5E-13   | 0         | 0         | 0         | 1E-12     | 1.225E-11 | 0         | 0         |
| $5 \times 10^{-6}$ M (MSE=1.21e-07)    | OV.  | 0         | 0         | 0         | 0         | 0         | 1         | 0         | 0         |
|                                        | CV.  | 0         | 0         | 0         | 0         | 0.000272  | 0.999197  | 0.0004965 | 0         |
|                                        | Var. | 0         | 0         | 0         | 0         | 7.43E-08  | 6.448E-07 | 2.465E-07 | 0         |
| $2 \times 10^{-5}$ M<br>(MSE=5.18e-07) | OV.  | 0         | 0         | 0         | 0         | 0         | 0         | 1         | 0         |
|                                        | CV.  | 0         | 0         | 0         | 0         | 0         | 0.000511  | 0.998138  | 0.0006455 |
|                                        | Var. | 0         | 0         | 0         | 0         | 0         | 2.611E-07 | 3.467E-06 | 4.166E-07 |
| $5 \times 10^{-5}$ M (MSE=6.91e-12)    | OV.  | 0         | 0         | 0         | 0         | 0         | 0         | 0         | 1         |
|                                        | CV.  | 0         | 0         | 0         | 0         | 0         | 0         | 0.0000025 | 0.999993  |
|                                        | Var. | 0         | 0         | 0         | 0         | 0         | 0         | 6.25E-12  | 4.9E-11   |

In Table S8, all data is utilized to test the BPNN. The  $I/I_0$  values at 616 nm of every GF concentration as input information are inputted in the input column of the BPNN. Through the BPNN calculation, various values (0-1) can be outputted, in which the values close to “0” represents the false GF concentrations, the values close to “1” represents the correct GF concentrations. By comparing the OV. with CV., the variance (Var.) can be obtained, which suggests that the BPNN has a good accuracy for distinguishing GF concentrations.

**Table S9.** The summary of input and output information in real batch calculation during the test of BPNN.

| Input data | Output data                  |                              |                              |                              |                              |                              |                              |                              |
|------------|------------------------------|------------------------------|------------------------------|------------------------------|------------------------------|------------------------------|------------------------------|------------------------------|
| $I/I_0$    | $5 \times 10^{-8} \text{ M}$ | $1 \times 10^{-7} \text{ M}$ | $5 \times 10^{-7} \text{ M}$ | $1 \times 10^{-6} \text{ M}$ | $2 \times 10^{-6} \text{ M}$ | $5 \times 10^{-6} \text{ M}$ | $2 \times 10^{-5} \text{ M}$ | $5 \times 10^{-5} \text{ M}$ |
| 1.12425    | 1                            | 1.98E-05                     | 1.1E-12                      | 0.00019                      | 7.32E-07                     | 0                            | 0                            | 0                            |
| 1.62626    | 0                            | 0.999963                     | 2.9E-05                      | 1.5E-08                      | 0                            | 0                            | 0                            | 2.8E-16                      |
| 3.33199    | 0                            | 0.000163                     | 0.99992                      | 7E-05                        | 0                            | 0                            | 0                            | 5.6E-17                      |
| 4.10211    | 0                            | 0                            | 0.00013                      | 0.99983                      | 5.55E-17                     | 0                            | 0                            | 0                            |
| 5.64889    | 0                            | 0                            | 1.6E-14                      | 0.00025                      | 1                            | 0.000272                     | 0                            | 0                            |
| 11.4487    | 0                            | 0                            | 1.5E-07                      | 9.5E-11                      | 3.57E-06                     | 0.999197                     | 0.000511                     | 0                            |
| 29.5322    | 0                            | 3.60E-11                     | 6.5E-05                      | 3.7E-14                      | 5.33E-15                     | 0.000497                     | 0.998138                     | 2.6E-06                      |
| 69.2656    | 0                            | 0.000168                     | 5.2E-07                      | 3.3E-16                      | 1.67E-16                     | 1.87E-14                     | 0.000645                     | 0.99999                      |

In [Table S9](#), all data is utilized to test the BPNN. The  $I/I_0$  values at 616 nm of every GF concentration as input information are inputted in the input column of the BPNN. Through the BPNN calculation, various values (0-1) can be acquired, in which the values close to “0” represents the false GF concentration, and the values close to 1 represents the correct GF concentration.
